# Supplementary material for: Mechanistic analysis identifying reaction pathways for rapid reductive photodebromination of polybrominated diphenyl ethers using BiVO4/BiOBr/Pd heterojunction nanocomposite photocatalyst
Source: Royal Society of Chemistry journal article supplement (doi:10.1039/d1en01128f), 2022-01-01
Supplement: d1en01128f1.pdf [file d1en01128f1.pdf]

## Electronic Supplementary Information

### Mechanistic analysis identifying reaction pathways for rapid reductive photodebromination of polybrominated diphenyl ethers using BiVO<sub>4</sub>/BiOBr/Pd heterojunction nanocomposite photocatalyst

Edward B. Miller,<sup>a</sup> Elsayed M. Zahran,<sup>b</sup> Marc R. Knecht,<sup>a,c</sup> and Leonidas G. Bachas<sup>a,c\*</sup>

<sup>a</sup> Department of Chemistry, University of Miami, Coral Gables, Florida 33146, United States

<sup>b</sup> Department of Chemistry, Ball State University, Muncie, Indiana 47306, United States

<sup>c</sup> Dr. J. T. Macdonald Foundation Biomedical Nanotechnology Institute, University of Miami, UM Life Science Technology Building, 1951 NW 7th Ave, Suite 475, Miami, Florida 33136, United States

#### Contents

|                                                                                                                                                                                    |    |
|------------------------------------------------------------------------------------------------------------------------------------------------------------------------------------|----|
| <b>Figure S1.</b> EDS spectra of (a) predominantly <i>m</i> -BiVO <sub>4</sub> region and (b) predominantly BiOBr region of the <i>m</i> -BiVO <sub>4</sub> /BiOBr composite. .... | S2 |
| <b>Figure S2.</b> Adsorption of BDE-47 from 25 μM 1:1 EtOH/H <sub>2</sub> O solution on BiVO <sub>4</sub> /BiOBr/Pd particles stirring in darkness. ....                           | S3 |
| <b>Figure S3.</b> Propanal produced in the photodebromination of 100 μM BDE-3 with BiVO <sub>4</sub> /BiOBr/Pd in 1:1 solution of 1-propanol / H <sub>2</sub> O. ....              | S3 |
| <b>Table S1.</b> Reaction of BDE-3 with <i>m</i> -BiVO <sub>4</sub> /BiOBr/Pd in different solvent systems .....                                                                   | S4 |
| <b>Natural Bond Orbital (NBO) analysis of selected alcohols</b> .....                                                                                                              | S4 |
| <b>Table S2.</b> Select computed Natural Bond Orbital (NBO) data for C1-C3 alcohols, from DFT calculations at the B3LYP/6-31G(d,p) level. ....                                     | S4 |
| <b>References</b> .....                                                                                                                                                            | S5 |

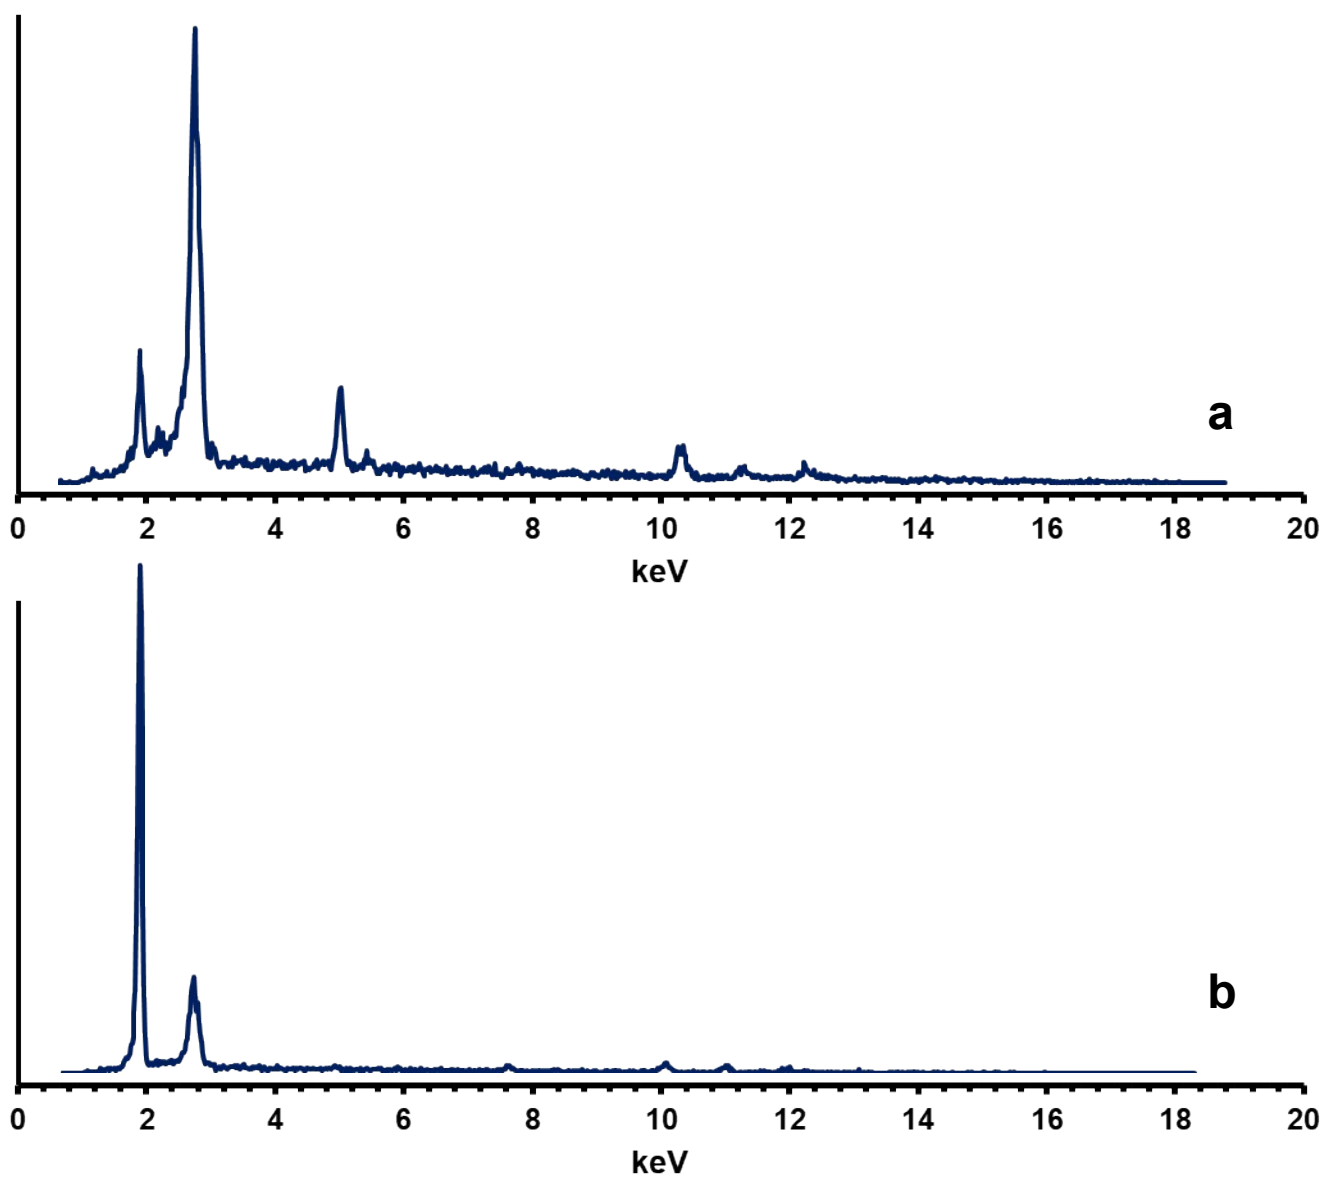

**Figure S1.** EDS spectra of (a) predominantly  $m\text{-BiVO}_4$  region and (b) predominantly BiOBr region of the  $m\text{-BiVO}_4/\text{BiOBr}$  composite.

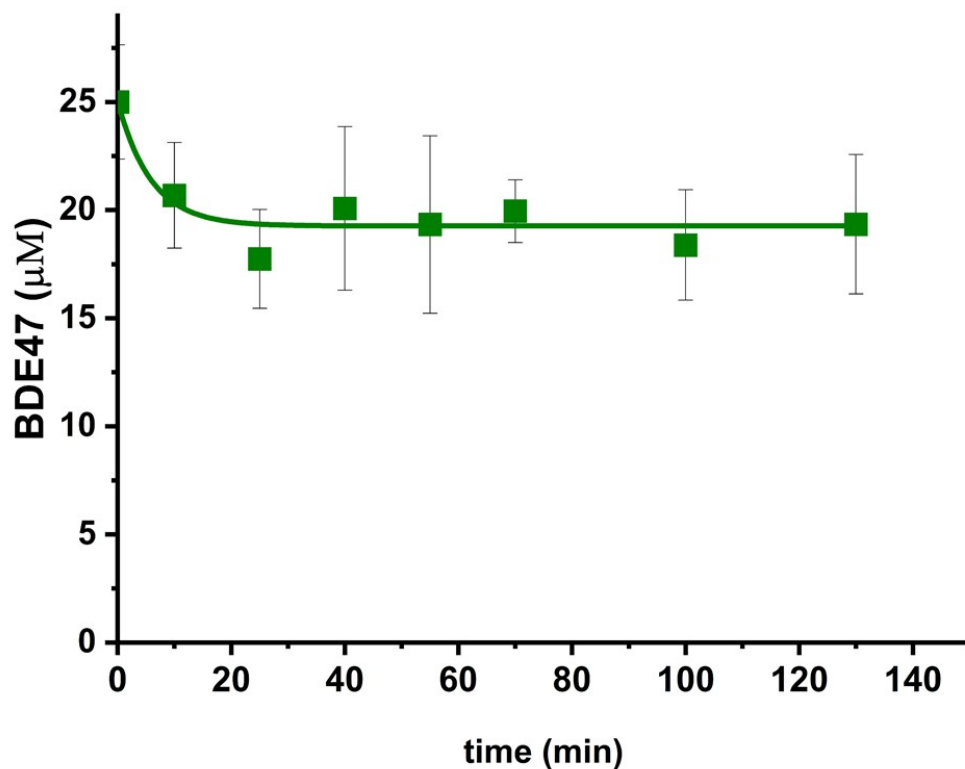

**Figure S2.** Adsorption of BDE-47 from 25  $\mu\text{M}$  1:1 EtOH/H<sub>2</sub>O solution on BiVO<sub>4</sub>/BiOBr/Pd particles stirring in darkness.

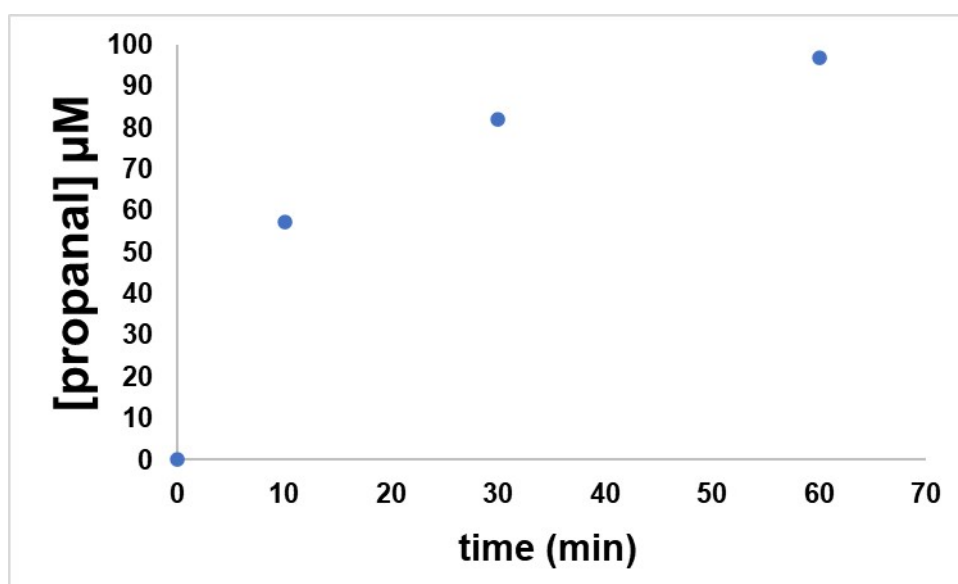

**Figure S3.** Propanal produced in the photodebromination of 100  $\mu\text{M}$  BDE-3 with BiVO<sub>4</sub>/BiOBr/Pd in 1:1 solution of 1-propanol / H<sub>2</sub>O

**Table S1.** Reaction of BDE-3 with *m*-BiVO<sub>4</sub>/BiOBr/Pd in different solvent systems

These reactions were done using a xenon lamp solar simulator as light source.

| solvent system                        | reaction time                                       |        |        |
|---------------------------------------|-----------------------------------------------------|--------|--------|
|                                       | 5 min                                               | 10 min | 15 min |
|                                       | Percent of initial BDE-3 concentration debrominated |        |        |
| MeOH / H <sub>2</sub> O (1:1)         | 80%                                                 | 100%   | 100%   |
| EtOH / H <sub>2</sub> O (1:1)         | 80%                                                 | 100%   | 100%   |
| n-PrOH / H <sub>2</sub> O (1:1)       | 45%                                                 | 70%    | 75%    |
| i-PrOH / H <sub>2</sub> O (1:1)       | NR                                                  | NR     | NR *   |
| t-BuOH / H <sub>2</sub> O (1:1)       | NR                                                  | NR     | NR     |
| ACN / H <sub>2</sub> O (1:1)          | NR                                                  | NR     | NR     |
| ACN / EtOH / H <sub>2</sub> O (1:1:1) | 25%                                                 | 85%    | 100%   |

\* Trace amount of product detected after 30 min irradiation.

### Natural Bond Orbital (NBO)<sup>1</sup> analysis of selected alcohols

In a search for some measure of theoretical insight, simple Density Functional Theory (DFT) calculations were performed for the C<sub>1</sub>-C<sub>3</sub> alcohols in the gas phase, using the General Atomic and Molecular Electronic Structure System (GAMESS) package (US version),<sup>2, 3</sup> at the B3LYP/6-31G(d,p)<sup>4-9</sup> level of theory for geometry optimization, vibrational frequency, and single-point energy calculations. Initial (unoptimized) geometries, used for the input to GAMESS, were constructed using Avogadro (version 1.2.0).<sup>10, 11</sup> Conformations yielding the lowest total energy after optimization were used. Calculated energy, vibrational frequencies, and thermodynamic quantities were compared against the NIST Computational Chemistry Comparison and Benchmark Database<sup>12</sup> for validation of results. NBO analysis was completed in conjunction with the single-point energy calculations using NBO 7.0,<sup>13</sup> which was linked with the GAMESS package. Selected results are listed in Table S2. In addition, pK<sub>a</sub> values<sup>14</sup> for the hydroxyl H atoms are included for reference.

**Table S2.** Select computed Natural Bond Orbital (NBO) data for C1-C3 alcohols, from DFT calculations at the B3LYP/6-31G(d,p) level.

Interactions greater than 20 kJ/mol for donor-acceptor pairs are listed. Dissociation constants (pK<sub>a</sub>) for the alcohols included for reference.

| alcohol    | pK <sub>a</sub> <sup>14</sup> | natural charge on α-H |         |         | donor-acceptor orbital interactions (kJ/mol) |                                   |      |                   |                                   |      |
|------------|-------------------------------|-----------------------|---------|---------|----------------------------------------------|-----------------------------------|------|-------------------|-----------------------------------|------|
|            |                               |                       |         |         | O <sub>l.p.</sub>                            | σ* C-H <sub>α1</sub>              |      | O <sub>l.p.</sub> | σ* C-H <sub>α2</sub>              |      |
| methanol   | 15.09                         | 0.19003               | 0.19003 | 0.21676 | O <sub>l.p.</sub>                            | σ* C-H <sub>α1</sub>              | 26.6 | O <sub>l.p.</sub> | σ* C-H <sub>α2</sub>              | 26.6 |
| ethanol    | 15.93                         | 0.19518               | 0.19531 |         | O <sub>l.p.</sub>                            | σ* C-H <sub>α1</sub>              | 25.6 | O <sub>l.p.</sub> | σ* C-H <sub>α2</sub>              | 25.4 |
| 1-propanol | 16.1                          | 0.19284               | 0.21869 |         | O <sub>l.p.</sub>                            | σ* C-H <sub>α1</sub>              | 24.0 | O <sub>l.p.</sub> | σ* C <sub>1</sub> -C <sub>2</sub> | 27.9 |
| 2-propanol | 17.1                          | 0.23011               |         |         | O <sub>l.p.</sub>                            | σ* C <sub>1</sub> -C <sub>2</sub> | 25.3 | O <sub>l.p.</sub> | σ* C <sub>1</sub> -C <sub>3</sub> | 25.2 |

## References

1. F. Weinhold, *J. Comput. Chem.*, 2012, **33**, 2363-2379.
2. M. W. Schmidt, K. K. Baldridge, J. A. Boatz, S. T. Elbert, M. S. Gordon, J. H. Jensen, S. Koseki, N. Matsunaga, K. A. Nguyen, S. Su, T. L. Windus, M. Dupuis and J. A. Montgomery, *J. Comput. Chem.*, 1993, **14**, 1347-1363.
3. M. S. Gordon and M. W. Schmidt, in *Theory and Applications of Computational Chemistry*, 2005, DOI: 10.1016/b978-044451719-7/50084-6, pp. 1167-1189.
4. A. D. Becke, *Phys. Rev. A*, 1988, **38**, 3098-3100.
5. A. D. Becke, *J. Chem. Phys.*, 1993, **98**, 5648-5652.
6. C. Lee, W. Yang and R. G. Parr, *Phys Rev B Condens Matter*, 1988, **37**, 785-789.
7. S. H. Vosko, L. Wilk and M. Nusair, *Can. J. Phys.*, 1980, **58**, 1200-1211.
8. P. J. Stephens, F. J. Devlin, C. F. Chabalowski and M. J. Frisch, *J. Phys. Chem.*, 1994, **98**, 11623-11627.
9. P. C. Hariharan and J. A. Pople, *Theor. Chim. Acta*, 1973, **28**, 213-222.
10. *Journal*.
11. M. D. Hanwell, D. E. Curtis, D. C. Lonie, T. Vandermeersch, E. Zurek and G. R. Hutchison, *J. Cheminform.*, 2012, **4**, 17.
12. NIST Computational Chemistry Comparison and Benchmark Database, NIST Standard Reference Database Number 101, Release 20, August 2019, Editor: Russell D. Johnson III, <http://cccbdb.nist.gov>, DOI: 10.18434/T47C7Z).
13. J. K. B. E. D. Glendening, A. E. Reed, J. E. Carpenter, J. A. Bohmann, C. M. Morales, P. Karafiloglou, C. R. Landis, and F. Weinhold, *Journal*, 2018.
14. J. F. Stoddart, D. H. Barton, W. D. Ollis, P. G. Sammes, I. Sutherland, D. N. Jones, E. Haslam and C. Drayton, *Comprehensive Organic Chemistry; the Synthesis and Reactions of Organic Compounds; Chairman and Deputy Chairman of the Ed. Board: Derek Barton and W. David Ollis*, Pergamon Press, 1979.
